# Supplementary material for: Nintedanib Reduces Muscle Fibrosis and Improves Muscle Function of the Alpha-Sarcoglycan-Deficient Mice
Source: MDPI journal article supplement (doi:10.3390/biomedicines10102629), 2022-10-19
Supplement: s1 [file s1]

**Supplemental Table S1. List of the 40 Cytokines, chemokines and acute phase proteins analyzed.**

| Name       |        |        |           |
|------------|--------|--------|-----------|
| CXCL131    | IL-1ra | IL-16  | CXCL9     |
| C5a        | IL-2   | IL-17  | CCL3      |
| G-CSF      | IL-3   | IL-23  | CCL4      |
| GM-CSF     | IL-4   | IL-27  | CXCL2     |
| CCL1       | IL-5   | CXCL10 | CCL5      |
| CCL11      | IL-6   | CXCL11 | CXCL12    |
| ICAM-1     | IL-7   | CXCL1  | CCL17     |
| IFN-gamma  | IL-10  | M-CSF  | TIMP-1    |
| IL-1 alpha | IL-12  | CCL2   | TNF-alpha |
| IL-1 beta  | IL-13  | CCL12  | TREM-1    |

**Supplemental Table S2. List of the 84 fibrosis-related genes and 12 endogenous gene candidates analyzed.** Endogenous control genes are in bold.

| <b>Name</b> | <b>Acession Number</b> | <b>Name</b> | <b>Acession Number</b> | <b>Name</b>     | <b>Acession Number</b> |
|-------------|------------------------|-------------|------------------------|-----------------|------------------------|
| Acta2       | Mm00725412_s1          | Itga1       | Mm01306375_m1          | Smad7           | Mm00484742_m1          |
| Agt         | Mm00599662_m1          | Itga2       | Mm00434371_m1          | Snai1           | Mm00441533_g1          |
| Akt1        | Mm01331626_m1          | Itga3       | Mm00442910_m1          | Sp1             | Mm00489039_m1          |
| Bcl2        | Mm00477631_m1          | Itgav       | Mm00434486_m1          | Stat1           | Mm00439531_m1          |
| Bmp7        | Mm00432102_m1          | Itgb1       | Mm01253230_m1          | Stat6           | Mm01160477_m1          |
| Cav1        | Mm00483057_m1          | Itgb3       | Mm00443980_m1          | Tgfb1           | Mm01178820_m1          |
| Ccl11       | Mm00441238_m1          | Itgb5       | Mm00439825_m1          | Tgfb2           | Mm00436955_m1          |
| Ccl12       | Mm01617100_m1          | Itgb6       | Mm01269869_m1          | Tgfb3           | Mm00436960_m1          |
| Ccl3        | Mm00441259_g1          | Itgb8       | Mm00623991_m1          | Tgfbr1          | Mm00436964_m1          |
| Ccr2        | Mm00438270_m1          | Jun         | Mm00495062_s1          | Tgfbr2          | Mm00436977_m1          |
| Col3a1      | Mm01254476_m1          | Lox         | Mm00495386_m1          | Tgif1           | Mm01227699_m1          |
| Cebpb       | Mm00843434_s1          | Ltbp1       | Mm00498255_m1          | Thbs1           | Mm00449032_g1          |
| Col1a2      | Mm00483888_m1          | Mmp13       | Mm00439491_m1          | Thbs2           | Mm01279240_m1          |
| Col3a1      | Mm01254476_m1          | Mmp14       | Mm00485054_m1          | Timp1           | Mm00441818_m1          |
| Ctgf        | Mm01192932_g1          | Mmp1a       | Mm00473485_m1          | Timp2           | Mm00441825_m1          |
| Cxcr4       | Mm01996749_s1          | Mmp2        | Mm00439498_m1          | Timp3           | Mm00441826_m1          |
| Dcn         | Mm00514535_m1          | Mmp3        | Mm00440295_m1          | Timp4           | Mm01184417_m1          |
| Edn1        | Mm00438656_m1          | Mmp8        | Mm00439509_m1          | Tnf             | Mm00443258_m1          |
| Egf         | Mm00438696_m1          | Mmp9        | Mm00442991_m1          | Vegfa           | Mm01281449_m1          |
| Eng         | Mm00468256_m1          | Myc         | Mm00487804_m1          | <b>18s rRNA</b> | Hs99999901_s1          |
| Fasf        | Mm00438864_m1          | Nfkb1       | Mm00476361_m1          | <b>Gapdh</b>    | Mm99999915_g1          |
| Grem1       | Mm00488615_s1          | Pdgfa       | Mm01205760_m1          | <b>Hprt</b>     | Mm00446968_m1          |
| Hgf         | Mm01135193_m1          | Pdgfb       | Mm00440677_m1          | <b>Gusb</b>     | Mm00446953_m1          |
| Ifng        | Mm01168134_m1          | Plat        | Mm00476931_m1          | <b>Actb</b>     | Mm00607939_s1          |
| IL10        | Mm00439614_m1          | Plau        | Mm01274460_g1          | <b>B2m</b>      | Mm00437762_m1          |
| IL13        | Mm00434204_m1          | Plg         | Mm00447087_m1          | <b>Hmbs</b>     | Mm00660262_g1          |
| IL13ra      | Mm00515166_m1          | Serpina1a   | Mm02748447_g1          | <b>Ipo8</b>     | Mm01255158_m1          |
| IL1a        | Mm00439620_m1          | Serpine1    | Mm00435860_m1          | <b>Pgk1</b>     | Mm00435617_m1          |
| IL1b        | Mm00434228_m1          | Serpinh1    | Mm00438058_g1          | <b>Rplp2</b>    | Mm00782638_s1          |
| IL4         | Mm00445259_m1          | Smad2       | Mm00487530_m1          | <b>Tbp</b>      | Mm00446973_m1          |
| IL5         | Mm00439646_m1          | Smad3       | Mm01170760_m1          | <b>Tfrc</b>     | Mm00441941_m1          |
| ILk         | Mm01274281_g1          | Smad4       | Mm03023996_m1          |                 |                        |
| Inhbe       | Mm00434340_g1          | Smad6       | Mm00484738_m1          |                 |                        |
